# Supplementary material for: Electrically switchable photoluminescence of fluorescent-molecule-dispersed liquid crystals prepared via photoisomerization-induced phase separation
Source: Royal Society of Chemistry journal article supplement (doi:10.1039/c3tc32174f), 2013-12-13
Supplement: c3tc32174f.pdf [file c3tc32174f.pdf]

## Supporting Information

### **Electrically Switchable Photoluminescence of Fluorescent-Molecule-Dispersed Liquid Crystal Prepared *via* Photoisomerization-Induced Phase Separation**

*Hongbo Lu*<sup>\*a</sup>, *Longzhen Qiu*<sup>\*a</sup>, *Guiyu Zhang*<sup>a</sup>, *Aixiang Ding*<sup>b</sup>, *Weibing Xu*<sup>a</sup>, *Guobing Zhang*<sup>a</sup>, *Xianghua Wang*<sup>a</sup>, *Lin Kong*<sup>b</sup>, *Yupeng Tian*<sup>b</sup>, and *Jiaxiang Yang*<sup>\*b</sup>

<sup>a</sup> Key Lab of Special Display Technology, Ministry of Education, National Engineering Lab of Special Display Technology, State Key Lab of Advanced Display Technology, Academy of Opto-Electronic Technology, Hefei University of Technology, Hefei, 230009, People's Republic of China

<sup>b</sup> College of Chemistry and Chemical Engineering, Anhui University, Hefei, 230601, People's Republic of China

\*Corresponding author: [bozhilu@hfut.edu.cn](mailto:bozhilu@hfut.edu.cn); [lzhqiu@hfut.edu.cn](mailto:lzhqiu@hfut.edu.cn); [jxyang@ahu.edu.cn](mailto:jxyang@ahu.edu.cn)

## Table of Contents

|                                                 |             |
|-------------------------------------------------|-------------|
| <b>1. General Experimental Section</b>          | <b>S-3</b>  |
| <b>2. Experimental Procedures</b>               | <b>S-4</b>  |
| <b>3. Sample Preparation</b>                    | <b>S-6</b>  |
| <b>4. Supplementary Figures</b>                 | <b>S-7</b>  |
| <b>5. References for Supporting Information</b> | <b>S-34</b> |

## 1. General Experimental Section

### 1.1 Materials and Methods

All chemicals were purchased from Sigma Aldrich Chemical Co. and used without further purification. Synthetic route and characterization of (Z)-CN-APHP are described in this Supporting Information.  $^1\text{H}$  NMR spectra were recorded on Agilent VNMRS600 (600 MHz) and Bruker Avance (400 MHz). Chemical shifts are reported in  $\delta$ , ppm and the coupling constants ( $J$ ) are given in Hz.  $^{13}\text{C}$  NMR spectra were also measured on Bruker Avance (400 MHz). Mass spectra (MS) were obtained using an Agilent Q-TOF 6540 mass spectrometer. UV-vis absorption spectra were recorded on a TU-1901 of Beijing Purkinje General Co. PC spectrometer using samples in solutions. Fluorescence spectra were recorded on a Shimadzu RF 5301 PC fluorescence spectrometer using samples in both the solution and the solid state. Differential scanning calorimetry (DSC) was performed on a METTLER821e/400 instrument at a heating and cooling rate of  $10\text{ }^\circ\text{C min}^{-1}$ . The absolute photoluminescence quantum yield of solid-film was measured on HORIBA FluoroMax-4 spectrofluorometer using an integrating sphere (HORIBA Scientific, F-3092 integrating sphere). Fluorescence images were obtained by using a digital camera (Canon PowerShot G6). Polarized microscopy images were collected on a microscope (Leica DM2500M). For the measurements of electrical switching of both photoluminescence and optical transmittance, a high-voltage waveform generator (High Speed Bipolar Amplifier BA4825) was used to apply ac (1000 Hz, square-wave) electric fields through the cell.

### 1.2 DFT Computational Methods

The hybrid B3LYP functional<sup>1</sup> has been used in all calculations as incorporated in *Gaussian 09* package,<sup>2</sup> mixing the exact Hartree-Fock-type exchange with Becke's exchange functional<sup>3</sup> and that proposed by Lee-Yang-Parr for the correlation contribution.<sup>4</sup> We used 6-31G(d) basis set for all the atoms which provides reasonably high quality results in moderate timescales. All ground state geometry optimizations were followed by subsequent frequency test to ascertain stationary points. TD-DFT energy calculations on ground state optimized structures were performed to simulate UV-vis absorption spectra of the compounds. 1st excited state optimizations were also performed using TD-DFT method. Visualizations of the optimized structures and the MOs were performed using *Gaussview5.0*.

## 2. Experimental Procedures

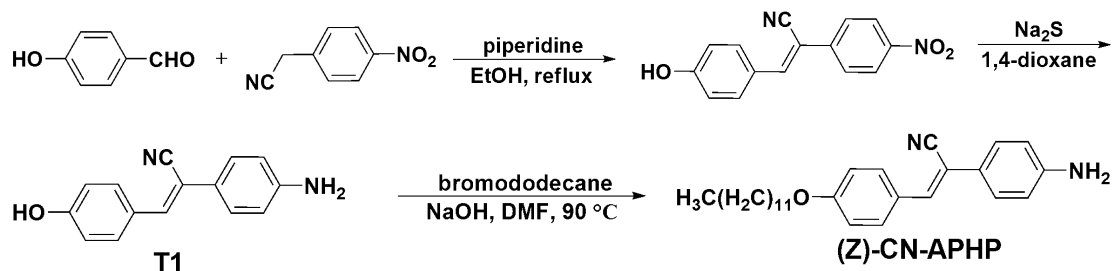

**Scheme S1.** Synthetic route of (Z)-CN-APHP

### Synthesis of (Z)-3-(4-hydroxyphenyl)-2-(4-nitrophenyl)acrylonitrile:

This compound was synthesized according to the method described in the literature.<sup>5</sup>

### Synthesis of (Z)-2-(4-aminophenyl)-3-(4-hydroxyphenyl)acrylonitrile (T1):

A mixture of (Z)-3-(4-hydroxyphenyl)-2-(4-nitrophenyl)acrylonitrile (1.14 g, 4.8 mmol) dissolved in 1,4-dioxane (40 mL), water (7.5 mL) and Na<sub>2</sub>S·9H<sub>2</sub>O (5.16 g, 20.8 mmol) was stirred at 90 °C for 4 h. Then a saturated solution of NaHCO<sub>3</sub> (120 mL) was added and the aqueous phase was extracted with EtOAc (2 × 60 mL). The combined organic layers were washed with brine and dried over MgSO<sub>4</sub>. After removal of solvent in vacuo, the crude product was recrystallized from ethanol and water to give a yellow solid with a yield of 78.9%.

FT-IR (KBr, cm<sup>-1</sup>): 3434 (vs), 3341 (vs), 3285 (vs), 2215 (m), 1793 (w), 1624 (m), 1605 (vs), 1521 (vs), 1447 (m), 1400 (m), 1281 (m), 1258 (s), 1179 (s), 890 (w), 825 (m).

<sup>1</sup>H NMR (CDCl<sub>3</sub>, 400 MHz, ppm): δ 10.02 (s, 1 H, OH), 7.75 (d, 2 H, ArH, *J* = 8.8 Hz), 7.54 (s, 1 H, CH), 7.36 (d, 2 H, ArH, *J* = 8.4 Hz), 6.66 (d, 2 H, ArH, *J* = 8.8 Hz), 6.62 (d, 2 H, ArH, *J* = 8.8 Hz), 5.42 (s, 2 H, NH<sub>2</sub>).

<sup>13</sup>C NMR (CDCl<sub>3</sub>, 400 MHz, ppm): δ 158.9, 149.5, 137.1, 130.5, 137.1, 129.7, 128.3, 125.4, 121.3, 118.9, 115.7, 115.6, 105.8.

### Synthesis of (Z)-2-(4-aminophenyl)-3-(4-(dodecyloxy)phenyl)acrylonitrile (Z)-CN-APHP:

A mixture of compound T1 (800 mg, 3.84 mmol) dissolved in DMF (8 mL) and NaOH (227 mg, 7.68 mmol) was stirred for 15 min at RT. Then bromododecane (1.69 g, 6.78 mmol) was added, and the mixture was sequentially stirred for 12 h at 90 °C. The mixture was poured into 500 mL water and extracted with ethyl acetate (3 × 100 mL) three times. Finally, after silica gel column chromatography (n-hexane : EtOAc = 6:1), the product was recrystallized from ethanol and water to give a yellow

powder (982 mg, 2.43 mmol), yield 63.3%.

FT-IR (KBr,  $\text{cm}^{-1}$ ): 3444 (vs), 3359 (vs), 3133 (s), 2919 (vs), 2851 (s), 2215(m), 1627 (s), 1604 (vs), 1516 (s), 1472 (m), 1420 (w), 1391 (w), 1355 (w), 1284 (s), 1250 (vs), 1178 (s), 1135 (m), 1064 (m), 1032 (m), 1000 (w), 956 (w), 897 (w), 865 (w), 833 (s), 781 (w), 765 (w), 721 (w), 630 (w).

$^1\text{H}$  NMR ( $\text{CDCl}_3$ , 400 MHz):  $\delta$  7.80 (d, 2 H, ArH,  $J = 8.4$  Hz), 7.47 (d, 2 H, ArH,  $J = 8.8$  Hz), 7.28 (s, 1 H, CH), 6.93 (d, 2 H, ArH,  $J = 8.8$  Hz), 6.65 (d, 2 H, ArH,  $J = 8.4$  Hz), 4.00 (t, 2 H,  $\text{CH}_2$ ,  $J = 6.4$  Hz), 3.15 (t, 2 H,  $\text{CH}_2$ ,  $J = 7.2$  Hz), 1.77 (m, 2H,  $\text{CH}_2$ ), 1.64 (m, 2 H,  $\text{CH}_2$ ), 1.27 (m, 36 H,  $18 \times \text{CH}_2$ ), 0.88 (t, 3 H,  $\text{CH}_3$ ,  $J = 6.0$  Hz)

$^{13}\text{C}$  NMR ( $\text{CDCl}_3$ , 400 MHz):  $\delta$  155.1, 143.7, 132.3, 125.3, 121.7, 121.6, 118.2, 113.7, 109.5, 107.4, 103.6, 62.9, 36.5, 26.7, 24.4~23.9, 21.9, 20.7, 17.4, 8.9.

HRMS (ESI)  $m/z$   $[\text{M} + \text{Na}]^+$ : calcd for  $\text{C}_{27}\text{H}_{36}\text{N}_2\text{O}$ , 427.2725, found 427.2721.

### 3. Sample Preparation

**Irradiation Procedure of FMDLC:** The nematic LC (E7) was purchased from Jiangsu Hecheng Display Technology Co., Ltd. To prepare the LC composite, weighed E7 and (Z)-CN-APHP were first dissolved in THF, a common solvent for all compounds; then, the mixture was dried in a vacuum oven to remove the solvent. To enter the mixture in a chosen ITO-coated, rubbed cell (Shenzhen Success Electronics Co., Ltd), it was heated to 100 °C and flow-filled into the cell through a capillary effect. Afterwards, the cell was taken out of the hot stage for slow cooling to room temperature to allow the aggregation of the (Z)-CN-APHP inside the predetermined LC orientational template. The cells were placed at a distance of 5 cm from the 365 nm hand-held UV lamp ( $0.87 \text{ mW/cm}^{-2}$ ) under atmospheric conditions at room temperature, and irradiated simultaneously for 3h.

**Irradiation Procedure of powdered crystal:** The finely powdered crystal samples of (Z)-CN-APHP were made into thin film in the sandwich quartz cell. The cells were placed at a distance of 5 cm from the 365 nm hand-held UV lamp ( $0.87 \text{ mW/cm}^{-2}$ ) under atmospheric conditions at 90 °C, and irradiated simultaneously for 2h.

## 4. Supplementary Figures

### 4.1 Gel images of CN-APHP and liquid crystal

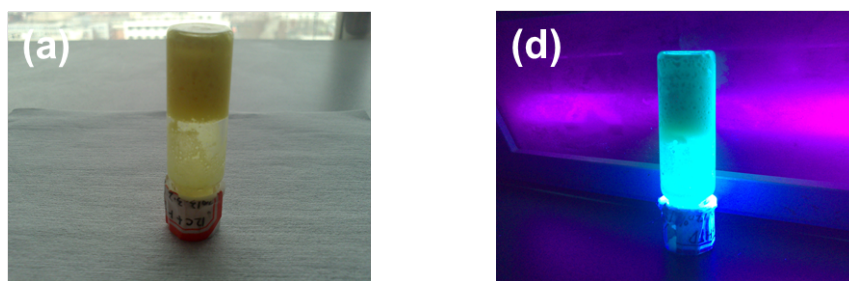

**Fig. S1** Gel of the mixture of CN-APHP and liquid crystal: (a) under room light, (b) under UV light.

### 4.2 Polarized optical microscopy (POM) image of (Z)-CN-APHP

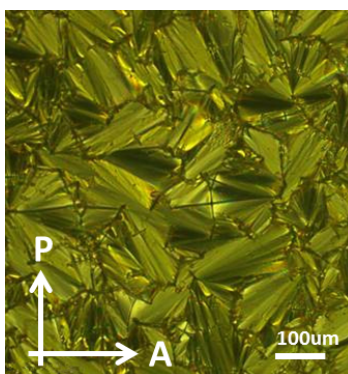

**Fig. S2** Focal conic fan-shaped texture of (Z)-CN-APHP observed by POM in the smectic phase at 75 °C on the cooling process

### 4.3 Geometry difference between (Z)- and (E)-CN-APHP

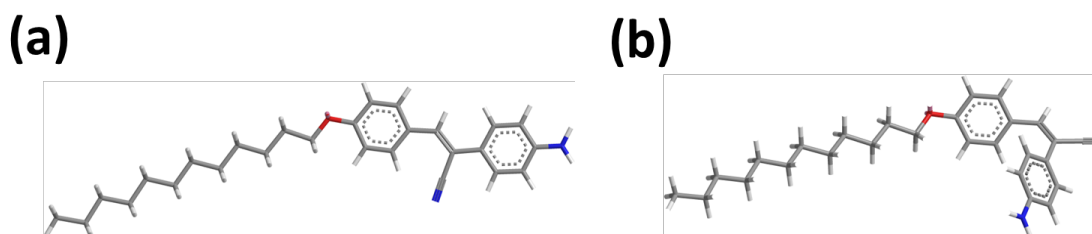

**Fig. S3** Geometry optimization of (Z)- (a) and (E)-CN-APHP (b) by quantum chemical calculations based on density functional theory.

#### 4.4 Energy levels of HOMO and LUMO and electron cloud distributions of (Z)- and (E)-CN-APHP molecules

As calculated by the B3LYP/6-31G(d) program,  $E_g$  of Z-isomer is 3.42 eV ( $E_g = \text{LUMO-HOMO}$ ), which is lower than that of E-isomer (3.53 eV), so it means that it is easier for Z-isomer to convert into E-isomer in theory, which is in good agreement with the absorption spectra (Fig. S2).

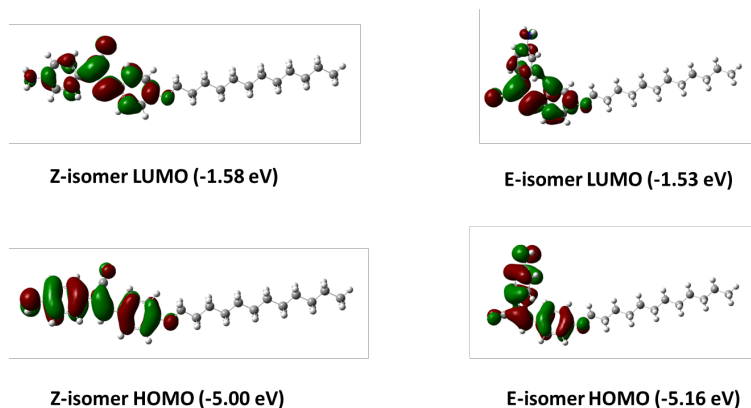

**Fig. S4** Energy levels of HOMO and LUMO and electron cloud distributions of (Z)- and (E)-CN-APHP molecules calculated by the B3LYP/6-31G(d) program.

#### 4.5 HRMS

HRMS was also studied in this paper in order to eliminate the possibility of [2+2] cycloaddition of CN-APHP in the irradiation process. As shown in Fig. S5, there were the same  $m/z$  peaks (found 427.2721 in MS) in different samples, which indicated that [2+2] cycloaddition of CN-APHP never occurred and only isomerization happened in the irradiation process.

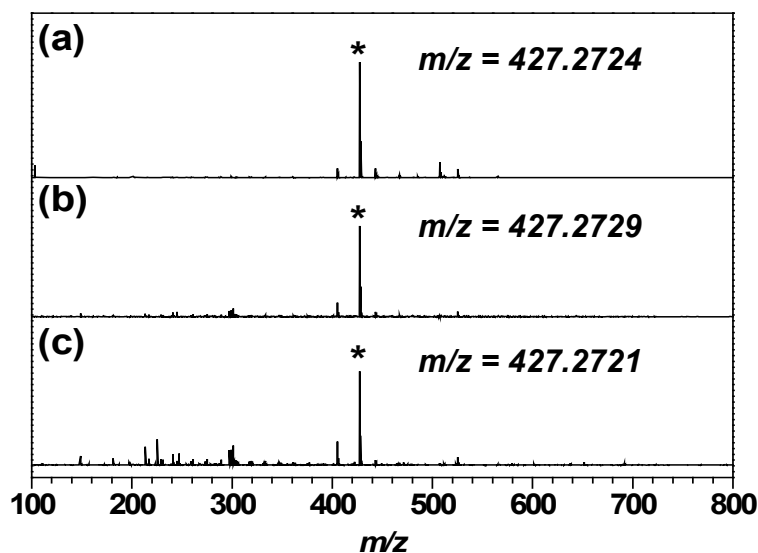



**Fig. S5** HRMS of different samples with different treatments. (a) Z-isomer in DMF solution which was irradiated for 4h at 365 nm, (b) Z-isomer film in the quartz cell irradiated for 4h at 365 nm in the liquid crystalline phase, (c) pure Z-isomer powder without any treatment.

#### 4.6 Photoisomerization of (Z)-CN-APHP in solution

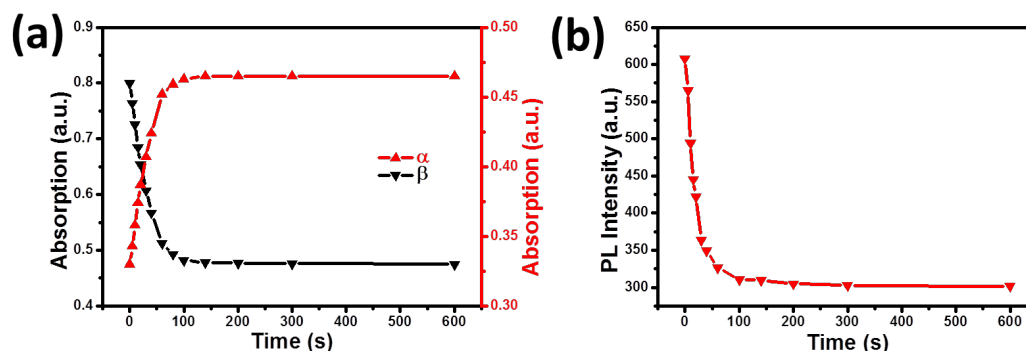

**Fig. S6** (a) The influence of the irradiation time on absorption peaks of CN-APHP in DMF ( $2.5 \times 10^{-5}$  mol L<sup>-1</sup>), (b) The influence of the irradiation time on PL intensity of CN-APHP in DMF ( $2.5 \times 10^{-5}$  mol L<sup>-1</sup>).

#### 4.7 Photoisomerization of CN-APHP in LC

The photoisomerization of (Z)-CN-APHP in liquid crystal (83.3% E7 and 16.7% (Z)-CN-APHP) was investigated by UV-vis absorption spectra in **Fig. S7a**. It is clear that the decrease of absorption was depicted as a function of exposure time. Plotted in **Fig. S7b** is the development of fluorescence intensity emitted from FMDLC as a function of applied voltage. The system displays the stronger photoluminescence in the field-off state; with an electric field applied, the photoluminescence starts to decrease at the threshold voltage of 2.3 V. It should be mentioned that after LC molecules are aligned by the electric field, further increase in voltage showed little direct effect on the photoluminescence of FMDLC. As shown in **Fig. S7b**, after the voltage reaches to 20–30 V, the fluorescence intensity becomes almost a constant. **Fig. S7c** shows the evolution of POM of CN-APHP in LC by increasing the illumination time of 365 nm light ( $0.87 \text{ mW/cm}^2$ ).

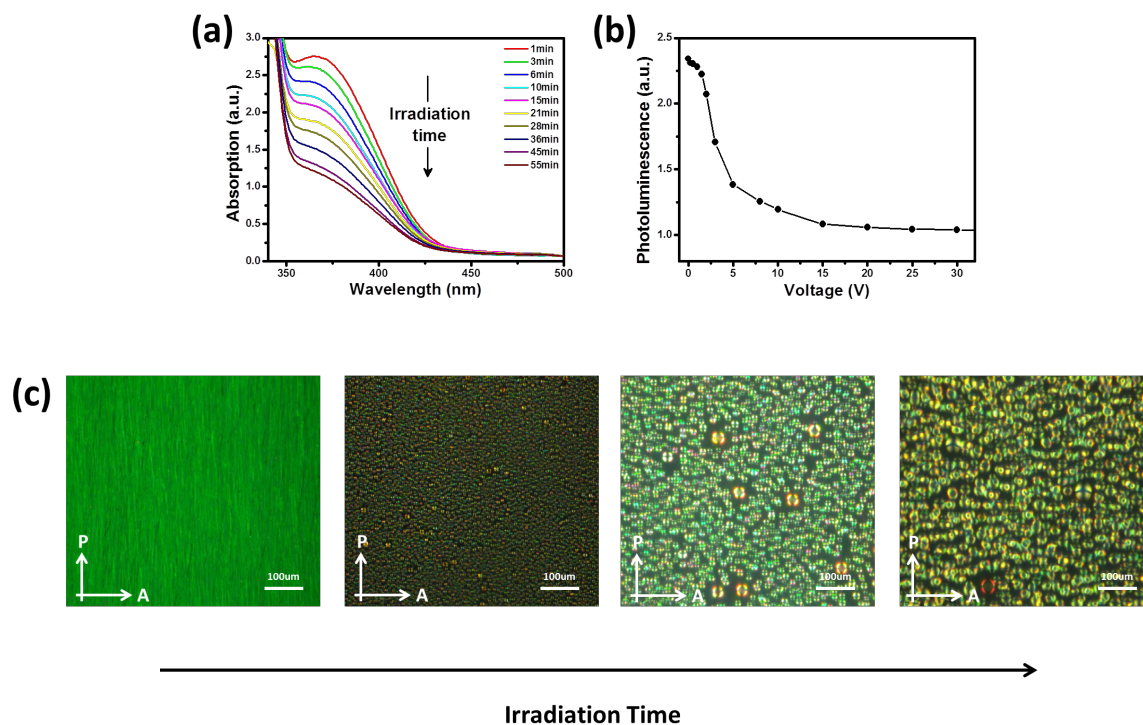

**Fig. S7** (a) Development of UV-vis absorption spectra of the cell filled with the mixture of CN-APHP and liquid crystal with increasing the illumination time of 365 nm light ( $0.87 \text{ mW/cm}^2$ ). (b) Plots of photoluminescence versus applied voltage (ac 1K Hz square-wave). (c) POM evolution of the cell filled with the mixture of CN-APHP and liquid crystal with increasing the illumination time of 365 nm light ( $0.87 \text{ mW/cm}^2$ ).

#### 4.8 The modulation mechanism of electrical switching of photoluminescence of FMDLC

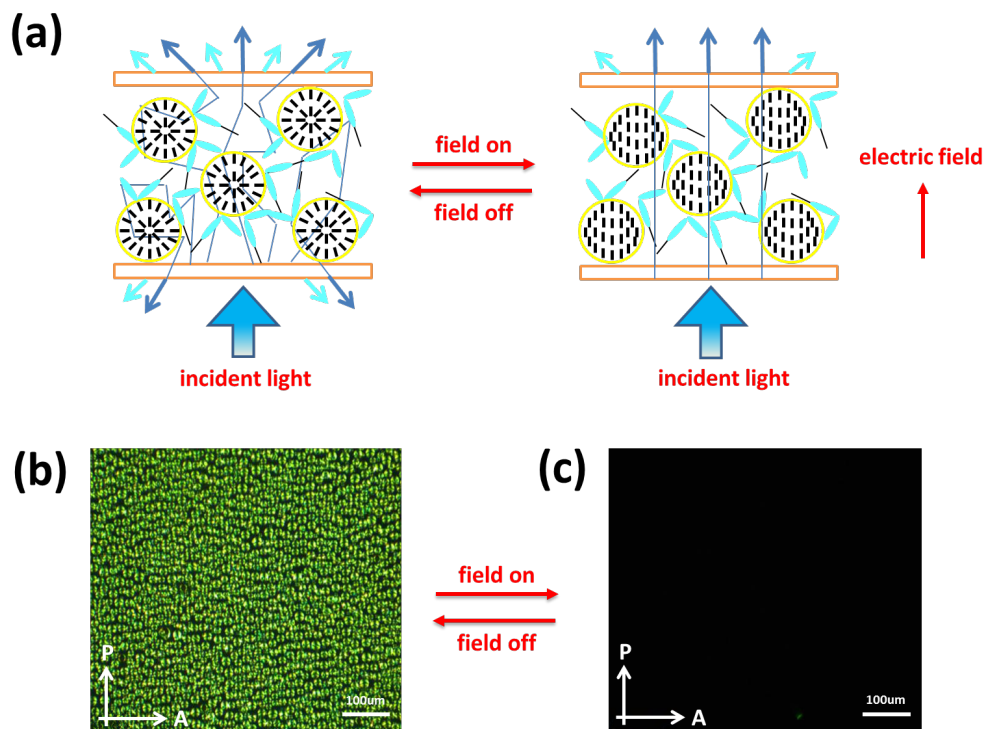

**Fig. S8** (a) Schematic illustration of the mechanism for electrically switchable photoluminescence of FMDLC: different photoluminescence intensities at the field-off and field-on state are attributed to different numbers of fluorescent molecules excited by the incident light modulated by electric-field-induced orientation of LC molecules. (b) POM of FMDLC without applying an electric field (0 V). (c) POM of FMDLC with applying an electric field (30 V).

#### 4.9 TD-DFT simulated UV-vis absorption spectra of Z, E-isomers

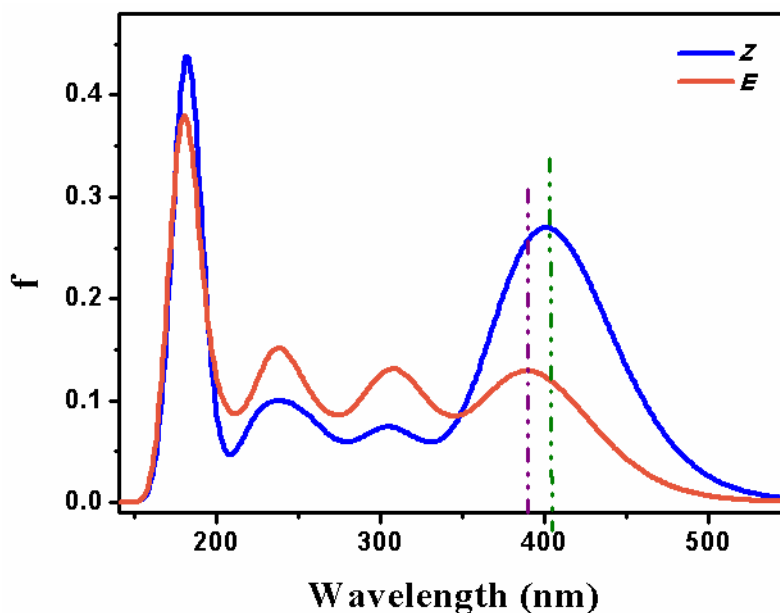

**Fig. S9** TD-DFT simulated UV-vis absorption spectra of Z, E-isomers (no of states considered = 50)

## Computational Data:

### Z-isomers (Ground state optimized geometry)

Energy = -1234.99749094 au

**Table S1:** Coordinates of optimized structure of **Z-isomers** (GS)

| Center Number | Atomic Number | Atomic Type | Coordinates (Angstroms) |           |           |
|---------------|---------------|-------------|-------------------------|-----------|-----------|
|               |               |             | X                       | Y         | Z         |
| 1             | 6             | 0           | 3.848638                | 2.540629  | -0.564097 |
| 2             | 6             | 0           | 2.596207                | 2.975420  | -0.436793 |
| 3             | 6             | 0           | 1.585756                | 2.113748  | 0.176807  |
| 4             | 6             | 0           | 1.927046                | 0.921340  | 0.646708  |
| 5             | 6             | 0           | 3.278163                | 0.476371  | 0.536759  |
| 6             | 6             | 0           | 4.213248                | 1.218293  | -0.053605 |
| 7             | 8             | 0           | 0.263470                | 2.518497  | 0.195440  |
| 8             | 6             | 0           | -14.050796              | -1.513088 | -0.320079 |
| 9             | 6             | 0           | -12.601432              | -1.955629 | -0.591921 |
| 10            | 6             | 0           | -11.634415              | -0.837204 | -0.163363 |
| 11            | 6             | 0           | -10.185516              | -1.285605 | -0.422855 |
| 12            | 6             | 0           | -9.219375               | -0.159583 | -0.015649 |
| 13            | 6             | 0           | -7.770312               | -0.622018 | -0.246079 |
| 14            | 6             | 0           | -6.805788               | 0.518607  | 0.115179  |
| 15            | 6             | 0           | -5.355196               | 0.029593  | -0.030765 |
| 16            | 6             | 0           | -4.403795               | 1.194950  | 0.269068  |
| 17            | 6             | 0           | -2.954635               | 0.693136  | 0.302382  |
| 18            | 6             | 0           | -2.030710               | 1.906795  | 0.451247  |
| 19            | 6             | 0           | -0.586742               | 1.444342  | 0.610486  |
| 20            | 6             | 0           | 5.612251                | 0.721092  | -0.246237 |
| 21            | 6             | 0           | 6.128580                | -0.413320 | 0.264794  |
| 22            | 6             | 0           | 7.471596                | -0.775930 | -0.043955 |
| 23            | 6             | 0           | 5.409305                | -1.295593 | 1.123038  |
| 24            | 7             | 0           | 4.830502                | -2.007792 | 1.815176  |
| 25            | 6             | 0           | 7.964856                | -1.884614 | 0.497268  |
| 26            | 6             | 0           | 9.319773                | -2.289580 | 0.209187  |
| 27            | 6             | 0           | 10.067898               | -1.551110 | -0.602697 |
| 28            | 6             | 0           | 9.528775                | -0.329960 | -1.207656 |
| 29            | 6             | 0           | 8.281542                | 0.042982  | -0.937999 |
| 30            | 7             | 0           | 11.359788               | -1.942206 | -0.872283 |
| 31            | 1             | 0           | 4.537063                | 3.115321  | -1.006639 |
| 32            | 1             | 0           | 2.347263                | 3.888510  | -0.759805 |
| 33            | 1             | 0           | 1.239619                | 0.336021  | 1.076659  |
| 34            | 1             | 0           | 3.529397                | -0.415507 | 0.912638  |
| 35            | 1             | 0           | -14.679324              | -2.239376 | -0.598328 |
| 36            | 1             | 0           | -14.249681              | -0.683004 | -0.841224 |
| 37            | 1             | 0           | -14.166172              | -1.329013 | 0.656018  |
| 38            | 1             | 0           | -12.403151              | -2.785478 | -0.070430 |
| 39            | 1             | 0           | -12.486705              | -2.139314 | -1.568146 |

|    |   |   |            |           |           |
|----|---|---|------------|-----------|-----------|
| 40 | 1 | 0 | -11.826792 | -0.009824 | -0.690994 |
| 41 | 1 | 0 | -11.755113 | -0.647244 | 0.810996  |
| 42 | 1 | 0 | -9.988620  | -2.104660 | 0.116027  |
| 43 | 1 | 0 | -10.068808 | -1.489434 | -1.394819 |
| 44 | 1 | 0 | -9.402210  | 0.653133  | -0.568833 |
| 45 | 1 | 0 | -9.350144  | 0.058568  | 0.951464  |
| 46 | 1 | 0 | -7.578133  | -1.416260 | 0.330405  |
| 47 | 1 | 0 | -7.648418  | -0.869793 | -1.207240 |
| 48 | 1 | 0 | -6.959921  | 1.292468  | -0.499235 |
| 49 | 1 | 0 | -6.967379  | 0.805026  | 1.059632  |
| 50 | 1 | 0 | -5.186153  | -0.715715 | 0.614237  |
| 51 | 1 | 0 | -5.203299  | -0.295757 | -0.964022 |
| 52 | 1 | 0 | -4.497167  | 1.890252  | -0.443547 |
| 53 | 1 | 0 | -4.636915  | 1.592889  | 1.156342  |
| 54 | 1 | 0 | -2.828518  | 0.074629  | 1.078032  |
| 55 | 1 | 0 | -2.744186  | 0.209960  | -0.547417 |
| 56 | 1 | 0 | -2.106242  | 2.482638  | -0.362775 |
| 57 | 1 | 0 | -2.301162  | 2.432115  | 1.258084  |
| 58 | 1 | 0 | -0.422135  | 0.640024  | 0.039562  |
| 59 | 1 | 0 | -0.405662  | 1.217182  | 1.567326  |
| 60 | 1 | 0 | 6.220112   | 1.283651  | -0.806692 |
| 61 | 1 | 0 | 7.396493   | -2.439173 | 1.105061  |
| 62 | 1 | 0 | 9.693467   | -3.121801 | 0.618729  |
| 63 | 1 | 0 | 10.096215  | 0.219999  | -1.820363 |
| 64 | 1 | 0 | 7.903449   | 0.875248  | -1.343432 |
| 65 | 1 | 0 | 11.723059  | -2.770145 | -0.457522 |
| 66 | 1 | 0 | 11.926531  | -1.398517 | -1.478558 |

**Z-isomers** (1st excited-state optimised geometry)

Energy = -1235.29969056 au

**Table S2:** Coordinates of optimized structure of **Z-isomers** (ES)

| Center Number | Atomic Number | Atomic Type | Coordinates (Angstroms) |           |           |
|---------------|---------------|-------------|-------------------------|-----------|-----------|
|               |               |             | X                       | Y         | Z         |
| 1             | 6             | 0           | 3.802935                | -1.985548 | -0.262332 |
| 2             | 6             | 0           | 2.444097                | -2.243346 | -0.298356 |
| 3             | 6             | 0           | 1.526332                | -1.191795 | -0.144286 |
| 4             | 6             | 0           | 2.005222                | 0.112555  | 0.048290  |
| 5             | 6             | 0           | 3.374789                | 0.358822  | 0.081010  |
| 6             | 6             | 0           | 4.314495                | -0.679164 | -0.077371 |
| 7             | 8             | 0           | 0.213267                | -1.537643 | -0.192906 |
| 8             | 6             | 0           | -14.848994              | 0.533085  | 0.066427  |
| 9             | 6             | 0           | -13.469342              | 1.191535  | 0.168385  |
| 10            | 6             | 0           | -12.310842              | 0.195965  | 0.025746  |
| 11            | 6             | 0           | -10.925461              | 0.846977  | 0.126520  |
| 12            | 6             | 0           | -9.767152               | -0.148897 | -0.016124 |

|    |   |   |            |           |           |
|----|---|---|------------|-----------|-----------|
| 13 | 6 | 0 | -8.382003  | 0.503036  | 0.084449  |
| 14 | 6 | 0 | -7.223627  | -0.492733 | -0.058325 |
| 15 | 6 | 0 | -5.838901  | 0.160174  | 0.041903  |
| 16 | 6 | 0 | -4.681081  | -0.835914 | -0.101204 |
| 17 | 6 | 0 | -3.297184  | -0.180781 | -0.001232 |
| 18 | 6 | 0 | -2.145345  | -1.183803 | -0.145885 |
| 19 | 6 | 0 | -0.779563  | -0.519179 | -0.045060 |
| 20 | 6 | 0 | 5.762948   | -0.528530 | -0.060475 |
| 21 | 6 | 0 | 6.576093   | 0.566619  | -0.003721 |
| 22 | 6 | 0 | 8.056541   | 0.469106  | 0.055756  |
| 23 | 6 | 0 | 6.050052   | 1.900083  | -0.019908 |
| 24 | 7 | 0 | 5.669081   | 3.001283  | -0.040568 |
| 25 | 6 | 0 | 8.870990   | 1.504481  | -0.436648 |
| 26 | 6 | 0 | 10.256510  | 1.414788  | -0.409400 |
| 27 | 6 | 0 | 10.893503  | 0.280272  | 0.121858  |
| 28 | 6 | 0 | 10.087295  | -0.751867 | 0.634145  |
| 29 | 6 | 0 | 8.702613   | -0.652505 | 0.605640  |
| 30 | 7 | 0 | 12.282152  | 0.161220  | 0.101173  |
| 31 | 1 | 0 | 4.499648   | -2.811972 | -0.382674 |
| 32 | 1 | 0 | 2.063191   | -3.249331 | -0.443234 |
| 33 | 1 | 0 | 1.320359   | 0.942787  | 0.175555  |
| 34 | 1 | 0 | 3.706430   | 1.377856  | 0.235492  |
| 35 | 1 | 0 | -15.653763 | 1.269636  | 0.172207  |
| 36 | 1 | 0 | -14.985665 | -0.224077 | 0.848483  |
| 37 | 1 | 0 | -14.979503 | 0.034034  | -0.901814 |
| 38 | 1 | 0 | -13.376241 | 1.968014  | -0.604321 |
| 39 | 1 | 0 | -13.382427 | 1.711919  | 1.132913  |
| 40 | 1 | 0 | -12.404607 | -0.581483 | 0.798817  |
| 41 | 1 | 0 | -12.398476 | -0.325354 | -0.939343 |
| 42 | 1 | 0 | -10.832815 | 1.624368  | -0.646572 |
| 43 | 1 | 0 | -10.838940 | 1.368348  | 1.091552  |
| 44 | 1 | 0 | -9.859464  | -0.926174 | 0.757073  |
| 45 | 1 | 0 | -9.853576  | -0.670362 | -0.981064 |
| 46 | 1 | 0 | -8.289671  | 1.280284  | -0.688750 |
| 47 | 1 | 0 | -8.295447  | 1.024457  | 1.049394  |
| 48 | 1 | 0 | -7.315344  | -1.269829 | 0.715060  |
| 49 | 1 | 0 | -7.309916  | -1.014255 | -1.023192 |
| 50 | 1 | 0 | -5.747006  | 0.937166  | -0.731529 |
| 51 | 1 | 0 | -5.752235  | 0.681473  | 1.006847  |
| 52 | 1 | 0 | -4.770898  | -1.612514 | 0.672467  |
| 53 | 1 | 0 | -4.766093  | -1.357094 | -1.066015 |
| 54 | 1 | 0 | -3.207667  | 0.595602  | -0.775264 |
| 55 | 1 | 0 | -3.212170  | 0.339837  | 0.964009  |
| 56 | 1 | 0 | -2.217702  | -1.956606 | 0.630184  |
| 57 | 1 | 0 | -2.213496  | -1.700415 | -1.111892 |
| 58 | 1 | 0 | -0.658178  | -0.020306 | 0.927260  |
| 59 | 1 | 0 | -0.654271  | 0.238681  | -0.831713 |
| 60 | 1 | 0 | 6.290692   | -1.478070 | -0.121084 |
| 61 | 1 | 0 | 8.409733   | 2.395824  | -0.852102 |
| 62 | 1 | 0 | 10.856571  | 2.229486  | -0.808483 |
| 63 | 1 | 0 | 10.555334  | -1.630933 | 1.071822  |

|    |   |   |           |           |          |
|----|---|---|-----------|-----------|----------|
| 64 | 1 | 0 | 8.114875  | -1.451310 | 1.048503 |
| 65 | 1 | 0 | 12.791084 | 1.035549  | 0.064551 |
| 66 | 1 | 0 | 12.673347 | -0.472237 | 0.787062 |

---

**TD-DFT obtained Excitation energies and oscillator strengths:**

|                   |           |           |           |          |              |
|-------------------|-----------|-----------|-----------|----------|--------------|
| Excited State 1:  | Singlet-A | 3.0888 eV | 401.40 nm | f=0.8882 | <S**2>=0.000 |
| 110 ->111         | 0.70515   |           |           |          |              |
| Excited State 2:  | Singlet-A | 4.0338 eV | 307.37 nm | f=0.2236 | <S**2>=0.000 |
| 109 ->111         | 0.69126   |           |           |          |              |
| 110 ->114         | -0.10868  |           |           |          |              |
| Excited State 3:  | Singlet-A | 4.3482 eV | 285.14 nm | f=0.0126 | <S**2>=0.000 |
| 108 ->111         | 0.52195   |           |           |          |              |
| 110 ->113         | -0.46310  |           |           |          |              |
| Excited State 4:  | Singlet-A | 4.3601 eV | 284.36 nm | f=0.0015 | <S**2>=0.000 |
| 107 ->111         | 0.45737   |           |           |          |              |
| 109 ->112         | 0.12224   |           |           |          |              |
| 110 ->112         | 0.51915   |           |           |          |              |
| Excited State 5:  | Singlet-A | 4.6581 eV | 266.17 nm | f=0.0625 | <S**2>=0.000 |
| 108 ->111         | 0.47224   |           |           |          |              |
| 108 ->114         | 0.11987   |           |           |          |              |
| 110 ->113         | 0.50669   |           |           |          |              |
| Excited State 6:  | Singlet-A | 4.7961 eV | 258.51 nm | f=0.0934 | <S**2>=0.000 |
| 107 ->111         | 0.50239   |           |           |          |              |
| 109 ->112         | 0.12268   |           |           |          |              |
| 110 ->112         | -0.47121  |           |           |          |              |
| Excited State 7:  | Singlet-A | 5.0532 eV | 245.36 nm | f=0.1374 | <S**2>=0.000 |
| 106 ->111         | 0.10803   |           |           |          |              |
| 110 ->114         | 0.58057   |           |           |          |              |
| 110 ->115         | -0.32037  |           |           |          |              |
| 110 ->116         | 0.14807   |           |           |          |              |
| Excited State 8:  | Singlet-A | 5.3075 eV | 233.60 nm | f=0.0630 | <S**2>=0.000 |
| 106 ->111         | 0.54398   |           |           |          |              |
| 110 ->116         | -0.43025  |           |           |          |              |
| Excited State 9:  | Singlet-A | 5.3874 eV | 230.14 nm | f=0.0555 | <S**2>=0.000 |
| 106 ->111         | -0.24308  |           |           |          |              |
| 108 ->113         | -0.11205  |           |           |          |              |
| 109 ->112         | 0.12285   |           |           |          |              |
| 110 ->114         | 0.33446   |           |           |          |              |
| 110 ->115         | 0.46367   |           |           |          |              |
| 110 ->116         | -0.24182  |           |           |          |              |
| Excited State 10: | Singlet-A | 5.5257 eV | 224.38 nm | f=0.0214 | <S**2>=0.000 |

|                   |           |           |           |          |              |  |  |  |  |
|-------------------|-----------|-----------|-----------|----------|--------------|--|--|--|--|
| 108 ->114         | -0.10114  |           |           |          |              |  |  |  |  |
| 109 ->112         | 0.20476   |           |           |          |              |  |  |  |  |
| 109 ->113         | 0.64903   |           |           |          |              |  |  |  |  |
| Excited State 11: | Singlet-A | 5.5470 eV | 223.51 nm | f=0.0805 | <S**2>=0.000 |  |  |  |  |
| 107 ->111         | -0.16742  |           |           |          |              |  |  |  |  |
| 107 ->115         | 0.11648   |           |           |          |              |  |  |  |  |
| 109 ->112         | 0.60277   |           |           |          |              |  |  |  |  |
| 109 ->113         | -0.19780  |           |           |          |              |  |  |  |  |
| 110 ->116         | 0.16090   |           |           |          |              |  |  |  |  |
| Excited State 12: | Singlet-A | 5.6833 eV | 218.16 nm | f=0.0518 | <S**2>=0.000 |  |  |  |  |
| 106 ->111         | 0.31556   |           |           |          |              |  |  |  |  |
| 107 ->112         | -0.14644  |           |           |          |              |  |  |  |  |
| 109 ->112         | -0.11979  |           |           |          |              |  |  |  |  |
| 110 ->115         | 0.38900   |           |           |          |              |  |  |  |  |
| 110 ->116         | 0.42303   |           |           |          |              |  |  |  |  |
| Excited State 13: | Singlet-A | 5.7655 eV | 215.05 nm | f=0.0001 | <S**2>=0.000 |  |  |  |  |
| 105 ->111         | 0.69085   |           |           |          |              |  |  |  |  |
| Excited State 14: | Singlet-A | 5.8832 eV | 210.74 nm | f=0.0015 | <S**2>=0.000 |  |  |  |  |
| 93 ->111          | 0.16992   |           |           |          |              |  |  |  |  |
| 96 ->111          | -0.23284  |           |           |          |              |  |  |  |  |
| 97 ->111          | 0.29375   |           |           |          |              |  |  |  |  |
| 98 ->111          | 0.16181   |           |           |          |              |  |  |  |  |
| 99 ->111          | -0.31107  |           |           |          |              |  |  |  |  |
| 100 ->111         | 0.36636   |           |           |          |              |  |  |  |  |
| 101 ->111         | 0.14781   |           |           |          |              |  |  |  |  |
| 105 ->111         | -0.13453  |           |           |          |              |  |  |  |  |
| Excited State 15: | Singlet-A | 6.0205 eV | 205.94 nm | f=0.0157 | <S**2>=0.000 |  |  |  |  |
| 108 ->113         | 0.14945   |           |           |          |              |  |  |  |  |
| 109 ->114         | 0.64106   |           |           |          |              |  |  |  |  |
| 109 ->115         | -0.17954  |           |           |          |              |  |  |  |  |
| 109 ->116         | 0.10443   |           |           |          |              |  |  |  |  |
| Excited State 16: | Singlet-A | 6.2500 eV | 198.38 nm | f=0.0176 | <S**2>=0.000 |  |  |  |  |
| 96 ->111          | 0.11365   |           |           |          |              |  |  |  |  |
| 98 ->111          | -0.12207  |           |           |          |              |  |  |  |  |
| 99 ->111          | 0.46567   |           |           |          |              |  |  |  |  |
| 100 ->111         | 0.39789   |           |           |          |              |  |  |  |  |
| 101 ->111         | 0.20282   |           |           |          |              |  |  |  |  |
| 109 ->115         | -0.12473  |           |           |          |              |  |  |  |  |
| Excited State 17: | Singlet-A | 6.3061 eV | 196.61 nm | f=0.0040 | <S**2>=0.000 |  |  |  |  |
| 108 ->112         | 0.70468   |           |           |          |              |  |  |  |  |
| Excited State 18: | Singlet-A | 6.3849 eV | 194.18 nm | f=0.0301 | <S**2>=0.000 |  |  |  |  |
| 99 ->111          | 0.10395   |           |           |          |              |  |  |  |  |
| 107 ->112         | -0.13121  |           |           |          |              |  |  |  |  |



|           |          |
|-----------|----------|
| 108 ->113 | 0.19642  |
| 109 ->114 | 0.16699  |
| 109 ->115 | 0.51531  |
| 109 ->116 | -0.32092 |

Excited State 19: Singlet-A 6.4236 eV 193.01 nm f=0.0003 <S\*\*2>=0.000

|           |          |
|-----------|----------|
| 90 ->111  | 0.17377  |
| 92 ->111  | 0.10379  |
| 93 ->111  | 0.52480  |
| 95 ->111  | -0.13628 |
| 97 ->111  | 0.16562  |
| 98 ->111  | -0.10400 |
| 99 ->111  | 0.15617  |
| 100 ->111 | -0.23300 |

Excited State 20: Singlet-A 6.5027 eV 190.67 nm f=0.0218 <S\*\*2>=0.000

|           |          |
|-----------|----------|
| 94 ->111  | -0.11454 |
| 96 ->111  | -0.10492 |
| 103 ->111 | 0.46800  |
| 107 ->112 | 0.21516  |
| 109 ->115 | -0.18459 |
| 109 ->116 | -0.36398 |

Excited State 21: Singlet-A 6.5076 eV 190.52 nm f=0.0338 <S\*\*2>=0.000

|           |          |
|-----------|----------|
| 100 ->111 | -0.10373 |
| 101 ->111 | 0.18073  |
| 103 ->111 | 0.46267  |
| 107 ->112 | -0.26009 |
| 109 ->115 | 0.16658  |
| 109 ->116 | 0.35355  |

Excited State 22: Singlet-A 6.5300 eV 189.87 nm f=0.0011 <S\*\*2>=0.000

|           |          |
|-----------|----------|
| 96 ->111  | 0.11519  |
| 100 ->111 | -0.11845 |
| 101 ->111 | 0.22921  |
| 104 ->111 | 0.57504  |
| 107 ->113 | -0.25646 |

Excited State 23: Singlet-A 6.5320 eV 189.81 nm f=0.0033 <S\*\*2>=0.000

|           |         |
|-----------|---------|
| 104 ->111 | 0.24357 |
| 107 ->113 | 0.64946 |

Excited State 24: Singlet-A 6.5525 eV 189.22 nm f=0.0002 <S\*\*2>=0.000

|           |          |
|-----------|----------|
| 98 ->111  | -0.18923 |
| 102 ->111 | 0.66973  |

Excited State 25: Singlet-A 6.5747 eV 188.58 nm f=0.0217 <S\*\*2>=0.000

|           |          |
|-----------|----------|
| 94 ->111  | 0.21667  |
| 96 ->111  | 0.34835  |
| 97 ->111  | 0.24576  |
| 100 ->111 | -0.16390 |
| 101 ->111 | 0.27687  |

104 ->111 -0.29272  
107 ->112 0.19940

Excited State 26: Singlet-A 6.6321 eV 186.95 nm f=0.0195 <S\*\*2>=0.000  
92 ->111 -0.11505  
94 ->111 -0.29043  
96 ->111 -0.20019  
100 ->111 -0.16292  
101 ->111 0.45424  
103 ->111 -0.22473  
104 ->111 -0.14256  
107 ->112 -0.15551

Excited State 27: Singlet-A 6.6618 eV 186.11 nm f=0.0786 <S\*\*2>=0.000  
92 ->111 -0.19992  
97 ->111 0.10867  
98 ->111 0.11518  
100 ->113 -0.11156  
106 ->113 -0.22136  
108 ->114 0.53952  
110 ->113 -0.10521

Excited State 28: Singlet-A 6.6730 eV 185.80 nm f=0.0124 <S\*\*2>=0.000  
95 ->111 0.12360  
97 ->111 0.10730  
98 ->111 0.53915  
99 ->111 0.25298  
102 ->111 0.18490  
108 ->114 -0.19226

Excited State 29: Singlet-A 6.6975 eV 185.12 nm f=0.0189 <S\*\*2>=0.000  
89 ->111 -0.15373  
90 ->111 0.14972  
91 ->111 0.12774  
92 ->111 0.39381  
96 ->111 0.13294  
97 ->111 -0.28233  
98 ->111 0.27383  
106 ->112 0.16660  
108 ->114 0.16329

Excited State 30: Singlet-A 6.7148 eV 184.64 nm f=0.0502 <S\*\*2>=0.000  
97 ->111 0.18837  
106 ->112 0.61165  
108 ->113 -0.13604

Excited State 31: Singlet-A 6.7299 eV 184.23 nm f=0.1969 <S\*\*2>=0.000  
91 ->111 0.13463  
92 ->111 0.34642  
93 ->111 -0.22557  
96 ->111 -0.23071

97 ->111 0.19723  
99 ->111 0.15078  
106 ->112 -0.22235  
108 ->113 -0.27694

Excited State 32: Singlet-A 6.7348 eV 184.09 nm f=0.5115 <S\*\*2>=0.000  
92 ->111 0.22997  
93 ->111 -0.14257  
96 ->111 -0.13660  
97 ->111 0.13497  
108 ->113 0.49652  
108 ->114 0.11001  
109 ->114 -0.14734  
109 ->115 -0.14128  
110 ->118 0.11502

Excited State 33: Singlet-A 6.8543 eV 180.88 nm f=0.0295 <S\*\*2>=0.000  
91 ->111 -0.17571  
94 ->111 0.43867  
95 ->111 -0.10024  
96 ->111 -0.34043  
97 ->111 -0.26972  
101 ->111 0.14899  
107 ->112 0.14069

Excited State 34: Singlet-A 6.8864 eV 180.04 nm f=0.0396 <S\*\*2>=0.000  
94 ->111 0.12539  
106 ->113 0.46547  
107 ->114 -0.13947  
108 ->114 0.14870  
109 ->115 -0.10349  
109 ->118 0.10319  
110 ->118 -0.39720

Excited State 35: Singlet-A 6.9076 eV 179.49 nm f=0.1219 <S\*\*2>=0.000  
106 ->113 0.30905  
107 ->114 -0.28106  
108 ->113 -0.12153  
109 ->118 -0.11856  
110 ->118 0.48402

Excited State 36: Singlet-A 6.9143 eV 179.31 nm f=0.0390 <S\*\*2>=0.000  
106 ->113 0.28109  
107 ->114 0.59099  
107 ->115 -0.10995

Excited State 37: Singlet-A 6.9552 eV 178.26 nm f=0.0001 <S\*\*2>=0.000  
90 ->111 0.11738  
93 ->111 0.10334  
94 ->111 0.17097  
95 ->111 0.64055  
98 ->111 -0.12582

Excited State 38: Singlet-A 6.9825 eV 177.56 nm f=0.2878 <S\*\*2>=0.000  
88 ->111 -0.10022  
89 ->111 0.11682  
91 ->111 0.10735  
94 ->111 -0.12689  
107 ->112 0.38990  
108 ->113 0.12272  
108 ->115 -0.16544  
108 ->116 0.16171  
109 ->115 0.20032  
109 ->116 0.24817  
110 ->118 -0.19194

Excited State 39: Singlet-A 7.0265 eV 176.45 nm f=0.0162 <S\*\*2>=0.000  
85 ->111 -0.10479  
87 ->111 0.34335  
89 ->111 0.50078  
92 ->111 0.10736  
95 ->111 -0.12585  
97 ->111 -0.11425

Excited State 40: Singlet-A 7.0658 eV 175.47 nm f=0.0356 <S\*\*2>=0.000  
106 ->113 0.11153  
107 ->112 0.13537  
108 ->113 0.10324  
108 ->115 0.52979  
108 ->116 -0.32505

Excited State 41: Singlet-A 7.1634 eV 173.08 nm f=0.0038 <S\*\*2>=0.000  
109 ->120 0.10438  
110 ->117 -0.23569  
110 ->119 0.32715  
110 ->120 0.50705  
110 ->121 0.12440  
110 ->122 0.10619

Excited State 42: Singlet-A 7.2021 eV 172.15 nm f=0.0042 <S\*\*2>=0.000  
87 ->111 -0.14984  
90 ->111 -0.12133  
91 ->111 0.11445  
93 ->111 0.10130  
106 ->114 0.53041  
106 ->115 -0.18507  
106 ->116 0.12886

Excited State 43: Singlet-A 7.2203 eV 171.72 nm f=0.0109 <S\*\*2>=0.000  
87 ->111 0.11795  
88 ->111 -0.22793  
90 ->111 0.19258  
91 ->111 0.47422

92 ->111 -0.24286  
93 ->111 -0.12180  
94 ->111 0.19999

Excited State 44: Singlet-A 7.2377 eV 171.30 nm f=0.0015 <S\*\*2>=0.000  
84 ->111 -0.13298  
87 ->111 0.37037  
90 ->111 0.30200  
91 ->111 -0.29003  
93 ->111 -0.17862  
106 ->114 0.23108  
106 ->115 -0.10149

Excited State 45: Singlet-A 7.2689 eV 170.57 nm f=0.0572 <S\*\*2>=0.000  
107 ->115 -0.39979  
108 ->115 0.30218  
108 ->116 0.44738

Excited State 46: Singlet-A 7.2797 eV 170.32 nm f=0.0545 <S\*\*2>=0.000  
106 ->114 -0.16314  
107 ->115 0.47861  
108 ->115 0.22581  
108 ->116 0.36405

Excited State 47: Singlet-A 7.3206 eV 169.36 nm f=0.0000 <S\*\*2>=0.000  
99 ->112 -0.14311  
100 ->112 0.10824  
105 ->112 0.67662

Excited State 48: Singlet-A 7.3512 eV 168.66 nm f=0.0011 <S\*\*2>=0.000  
110 ->117 0.43373  
110 ->119 -0.12767  
110 ->120 0.14510  
110 ->121 0.19847  
110 ->122 0.43216  
110 ->123 -0.15091

Excited State 49: Singlet-A 7.3663 eV 168.31 nm f=0.0521 <S\*\*2>=0.000  
94 ->112 -0.11568  
107 ->116 0.64869

Excited State 50: Singlet-A 7.4214 eV 167.06 nm f=0.0010 <S\*\*2>=0.000  
90 ->111 -0.11939  
110 ->117 0.40799  
110 ->120 0.24237  
110 ->122 -0.37059  
110 ->123 0.28620

### **E-isomers** (Ground state optimized geometry)

Energy = -1234.98681356 au

**Table S3:** Coordinates of optimized structure of **E-isomers** (GS)

| Center Number | Atomic Number | Atomic Type | Coordinates (Angstroms) |           |           |
|---------------|---------------|-------------|-------------------------|-----------|-----------|
|               |               |             | X                       | Y         | Z         |
| 1             | 6             | 0           | -4.616799               | -3.186256 | -0.610697 |
| 2             | 6             | 0           | -3.392577               | -3.631750 | -0.299551 |
| 3             | 6             | 0           | -2.420455               | -2.725056 | 0.336839  |
| 4             | 6             | 0           | -2.800618               | -1.502519 | 0.668834  |
| 5             | 6             | 0           | -4.123873               | -1.059488 | 0.375475  |
| 6             | 6             | 0           | -5.001473               | -1.799660 | -0.288410 |
| 7             | 8             | 0           | -1.083609               | -3.106063 | 0.520647  |
| 8             | 6             | 0           | 13.125528               | 1.164235  | -0.492107 |
| 9             | 6             | 0           | 11.686789               | 1.649818  | -0.751197 |
| 10            | 6             | 0           | 10.690288               | 0.560395  | -0.313189 |
| 11            | 6             | 0           | 9.249739                | 1.068652  | -0.513672 |
| 12            | 6             | 0           | 8.260804                | -0.029204 | -0.084563 |
| 13            | 6             | 0           | 6.812500                | 0.494154  | -0.173081 |
| 14            | 6             | 0           | 5.858655                | -0.645972 | 0.225565  |
| 15            | 6             | 0           | 4.396559                | -0.156218 | 0.282406  |
| 16            | 6             | 0           | 3.506602                | -1.378895 | 0.584229  |
| 17            | 6             | 0           | 2.026777                | -0.983184 | 0.746794  |
| 18            | 6             | 0           | 1.192254                | -2.284394 | 0.805572  |
| 19            | 6             | 0           | -0.301828               | -1.957977 | 0.942836  |
| 20            | 6             | 0           | -6.393007               | -1.274076 | -0.696921 |
| 21            | 6             | 0           | -6.933521               | -0.016044 | -0.712775 |
| 22            | 6             | 0           | -8.319193               | 0.063449  | -1.033509 |
| 23            | 7             | 0           | -9.438474               | 0.128217  | -1.292644 |
| 24            | 6             | 0           | -6.249582               | 1.304670  | -0.388110 |
| 25            | 6             | 0           | -4.951707               | 1.512070  | -0.589571 |
| 26            | 6             | 0           | -4.293959               | 2.711979  | -0.161729 |
| 27            | 6             | 0           | -4.990906               | 3.657807  | 0.441766  |
| 28            | 6             | 0           | -6.442594               | 3.509801  | 0.601821  |
| 29            | 6             | 0           | -7.046478               | 2.392280  | 0.190523  |
| 30            | 7             | 0           | -4.323895               | 4.760150  | 0.936554  |
| 31            | 1             | 0           | -5.270222               | -3.794253 | -1.061778 |
| 32            | 1             | 0           | -3.138500               | -4.578273 | -0.498756 |
| 33            | 1             | 0           | -2.158690               | -0.887520 | 1.126770  |
| 34            | 1             | 0           | -4.402488               | -0.150028 | 0.684078  |
| 35            | 1             | 0           | 13.772770               | 1.871391  | -0.776414 |
| 36            | 1             | 0           | 13.294918               | 0.328513  | -1.014553 |
| 37            | 1             | 0           | 13.244162               | 0.977094  | 0.483089  |
| 38            | 1             | 0           | 11.517911               | 2.485422  | -0.228446 |
| 39            | 1             | 0           | 11.568664               | 1.836619  | -1.726464 |
| 40            | 1             | 0           | 10.832812               | -0.262060 | -0.863942 |
| 41            | 1             | 0           | 10.835863               | 0.344850  | 0.652378  |
| 42            | 1             | 0           | 9.103437                | 1.886485  | 0.042976  |
| 43            | 1             | 0           | 9.104813                | 1.290812  | -1.477802 |
| 44            | 1             | 0           | 8.363555                | -0.820175 | -0.687729 |

|    |   |   |           |           |           |
|----|---|---|-----------|-----------|-----------|
| 45 | 1 | 0 | 8.457028  | -0.300331 | 0.857748  |
| 46 | 1 | 0 | 6.694195  | 1.266912  | 0.450440  |
| 47 | 1 | 0 | 6.616048  | 0.787060  | -1.108764 |
| 48 | 1 | 0 | 5.930197  | -1.381450 | -0.448127 |
| 49 | 1 | 0 | 6.122044  | -0.991501 | 1.126258  |
| 50 | 1 | 0 | 4.293875  | 0.526929  | 1.005422  |
| 51 | 1 | 0 | 4.137334  | 0.245655  | -0.595771 |
| 52 | 1 | 0 | 3.586224  | -2.031008 | -0.169676 |
| 53 | 1 | 0 | 3.821896  | -1.807426 | 1.430907  |
| 54 | 1 | 0 | 1.904995  | -0.462785 | 1.591948  |
| 55 | 1 | 0 | 1.735931  | -0.427685 | -0.032178 |
| 56 | 1 | 0 | 1.339089  | -2.807741 | -0.033759 |
| 57 | 1 | 0 | 1.484329  | -2.827401 | 1.592867  |
| 58 | 1 | 0 | -0.526134 | -1.171279 | 0.367727  |
| 59 | 1 | 0 | -0.510787 | -1.744161 | 1.897151  |
| 60 | 1 | 0 | -7.019657 | -1.987895 | -1.009655 |
| 61 | 1 | 0 | -4.416273 | 0.807356  | -1.055161 |
| 62 | 1 | 0 | -3.313789 | 2.832084  | -0.319239 |
| 63 | 1 | 0 | -6.978216 | 4.244525  | 1.017982  |
| 64 | 1 | 0 | -8.038200 | 2.296896  | 0.276582  |
| 65 | 1 | 0 | -4.819268 | 5.462294  | 1.428379  |
| 66 | 1 | 0 | -3.331958 | 4.820290  | 0.841493  |

-----  
**E-isomers** (1st excited-state optimized geometry)

Energy = -1235.29531435 au

**Table S4:** Coordinates of optimized structure of **E-isomers** (ES)

| Center Number | Atomic Number | Atomic Type | Coordinates (Angstroms) |           |           |
|---------------|---------------|-------------|-------------------------|-----------|-----------|
|               |               |             | X                       | Y         | Z         |
| 1             | 6             | 0           | 4.364162                | -2.937903 | 0.460492  |
| 2             | 6             | 0           | 2.990875                | -3.050885 | 0.602224  |
| 3             | 6             | 0           | 2.155370                | -1.988752 | 0.222487  |
| 4             | 6             | 0           | 2.726814                | -0.820441 | -0.303979 |
| 5             | 6             | 0           | 4.109795                | -0.716001 | -0.427364 |
| 6             | 6             | 0           | 4.966002                | -1.762061 | -0.039352 |
| 7             | 8             | 0           | 0.821873                | -2.191885 | 0.393000  |
| 8             | 6             | 0           | -14.030128              | 1.033267  | -0.071920 |
| 9             | 6             | 0           | -12.609021              | 1.525406  | -0.364565 |
| 10            | 6             | 0           | -11.526091              | 0.502639  | 0.002623  |
| 11            | 6             | 0           | -10.099793              | 0.987180  | -0.287468 |
| 12            | 6             | 0           | -9.017195               | -0.035946 | 0.079928  |
| 13            | 6             | 0           | -7.591001               | 0.448985  | -0.210910 |
| 14            | 6             | 0           | -6.508563               | -0.574307 | 0.156480  |
| 15            | 6             | 0           | -5.082616               | -0.089162 | -0.135280 |
| 16            | 6             | 0           | -4.001061               | -1.113026 | 0.232359  |
| 17            | 6             | 0           | -2.575622               | -0.626730 | -0.060982 |
| 18            | 6             | 0           | -1.500888               | -1.656862 | 0.309720  |

|    |   |   |            |           |           |
|----|---|---|------------|-----------|-----------|
| 19 | 6 | 0 | -0.092431  | -1.161624 | 0.012212  |
| 20 | 6 | 0 | 6.419849   | -1.745919 | -0.198805 |
| 21 | 6 | 0 | 7.302575   | -0.711583 | -0.300885 |
| 22 | 6 | 0 | 8.661292   | -1.069252 | -0.608808 |
| 23 | 7 | 0 | 9.763790   | -1.336716 | -0.874267 |
| 24 | 6 | 0 | 7.061980   | 0.742013  | -0.100161 |
| 25 | 6 | 0 | 6.294915   | 1.216860  | 0.977286  |
| 26 | 6 | 0 | 6.108134   | 2.576728  | 1.186572  |
| 27 | 6 | 0 | 6.693226   | 3.523927  | 0.325630  |
| 28 | 6 | 0 | 7.476515   | 3.055895  | -0.743644 |
| 29 | 6 | 0 | 7.661317   | 1.693109  | -0.942583 |
| 30 | 7 | 0 | 6.555521   | 4.888301  | 0.567787  |
| 31 | 1 | 0 | 4.996649   | -3.774653 | 0.747358  |
| 32 | 1 | 0 | 2.536255   | -3.954455 | 0.995854  |
| 33 | 1 | 0 | 2.104304   | 0.006207  | -0.626257 |
| 34 | 1 | 0 | 4.527882   | 0.190405  | -0.849657 |
| 35 | 1 | 0 | -14.779162 | 1.785509  | -0.344670 |
| 36 | 1 | 0 | -14.159350 | 0.805724  | 0.993479  |
| 37 | 1 | 0 | -14.256597 | 0.118792  | -0.634046 |
| 38 | 1 | 0 | -12.521389 | 1.777963  | -1.430964 |
| 39 | 1 | 0 | -12.424940 | 2.460014  | 0.184347  |
| 40 | 1 | 0 | -11.614327 | 0.249571  | 1.069860  |
| 41 | 1 | 0 | -11.711069 | -0.433006 | -0.546152 |
| 42 | 1 | 0 | -10.012633 | 1.240239  | -1.354695 |
| 43 | 1 | 0 | -9.915869  | 1.922961  | 0.261271  |
| 44 | 1 | 0 | -9.103956  | -0.288814 | 1.147168  |
| 45 | 1 | 0 | -9.201131  | -0.971771 | -0.468568 |
| 46 | 1 | 0 | -7.504145  | 0.701704  | -1.278197 |
| 47 | 1 | 0 | -7.406859  | 1.384816  | 0.337592  |
| 48 | 1 | 0 | -6.594723  | -0.826750 | 1.223814  |
| 49 | 1 | 0 | -6.692600  | -1.510209 | -0.391728 |
| 50 | 1 | 0 | -4.996167  | 0.162892  | -1.202716 |
| 51 | 1 | 0 | -4.898157  | 0.846698  | 0.413011  |
| 52 | 1 | 0 | -4.085324  | -1.364644 | 1.299713  |
| 53 | 1 | 0 | -4.184100  | -2.048869 | -0.315633 |
| 54 | 1 | 0 | -2.491569  | -0.375910 | -1.128722 |
| 55 | 1 | 0 | -2.392578  | 0.309121  | 0.487484  |
| 56 | 1 | 0 | -1.567306  | -1.904787 | 1.376849  |
| 57 | 1 | 0 | -1.667418  | -2.591304 | -0.241334 |
| 58 | 1 | 0 | 0.126138   | -0.243009 | 0.576073  |
| 59 | 1 | 0 | 0.024742   | -0.936816 | -1.057885 |
| 60 | 1 | 0 | 6.861743   | -2.739017 | -0.263498 |
| 61 | 1 | 0 | 5.843506   | 0.508081  | 1.664569  |
| 62 | 1 | 0 | 5.520478   | 2.916449  | 2.036608  |
| 63 | 1 | 0 | 7.951740   | 3.768964  | -1.413461 |
| 64 | 1 | 0 | 8.283448   | 1.358165  | -1.768115 |
| 65 | 1 | 0 | 6.701493   | 5.491877  | -0.231202 |
| 66 | 1 | 0 | 5.742355   | 5.158510  | 1.105971  |

---

**TD-DFT obtained Excitation energies and oscillator strengths:**



|                  |           |           |           |          |              |
|------------------|-----------|-----------|-----------|----------|--------------|
| Excited State 1: | Singlet-A | 3.1698 eV | 391.14 nm | f=0.4200 | <S**2>=0.000 |
| 110 ->111        | 0.70227   |           |           |          |              |
| Excited State 2: | Singlet-A | 4.0025 eV | 309.77 nm | f=0.4017 | <S**2>=0.000 |
| 109 ->111        | 0.68733   |           |           |          |              |
| 110 ->114        | -0.12780  |           |           |          |              |
| Excited State 3: | Singlet-A | 4.3038 eV | 288.08 nm | f=0.0158 | <S**2>=0.000 |
| 107 ->111        | 0.12357   |           |           |          |              |
| 108 ->111        | -0.40653  |           |           |          |              |
| 110 ->112        | 0.55033   |           |           |          |              |
| Excited State 4: | Singlet-A | 4.5240 eV | 274.06 nm | f=0.0104 | <S**2>=0.000 |
| 107 ->111        | 0.45935   |           |           |          |              |
| 108 ->111        | 0.30219   |           |           |          |              |
| 109 ->112        | 0.11823   |           |           |          |              |
| 110 ->112        | 0.15057   |           |           |          |              |
| 110 ->113        | -0.39256  |           |           |          |              |
| Excited State 5: | Singlet-A | 4.6404 eV | 267.18 nm | f=0.1550 | <S**2>=0.000 |
| 107 ->111        | -0.17420  |           |           |          |              |
| 108 ->111        | 0.48231   |           |           |          |              |
| 108 ->114        | 0.10129   |           |           |          |              |
| 109 ->112        | -0.10383  |           |           |          |              |
| 110 ->112        | 0.36717   |           |           |          |              |
| 110 ->113        | 0.26336   |           |           |          |              |
| Excited State 6: | Singlet-A | 4.8959 eV | 253.24 nm | f=0.0234 | <S**2>=0.000 |
| 107 ->111        | 0.41754   |           |           |          |              |
| 109 ->112        | 0.18837   |           |           |          |              |
| 110 ->112        | -0.15450  |           |           |          |              |
| 110 ->113        | 0.49906   |           |           |          |              |
| Excited State 7: | Singlet-A | 5.1077 eV | 242.74 nm | f=0.2477 | <S**2>=0.000 |
| 106 ->111        | 0.12933   |           |           |          |              |
| 109 ->111        | 0.10427   |           |           |          |              |
| 109 ->114        | 0.10162   |           |           |          |              |
| 110 ->114        | 0.63401   |           |           |          |              |
| 110 ->115        | -0.16223  |           |           |          |              |
| Excited State 8: | Singlet-A | 5.2612 eV | 235.66 nm | f=0.0871 | <S**2>=0.000 |
| 107 ->111        | -0.20774  |           |           |          |              |
| 108 ->114        | -0.10409  |           |           |          |              |
| 109 ->112        | 0.62481   |           |           |          |              |
| 109 ->113        | 0.18015   |           |           |          |              |
| Excited State 9: | Singlet-A | 5.3567 eV | 231.46 nm | f=0.1147 | <S**2>=0.000 |
| 106 ->111        | 0.58961   |           |           |          |              |
| 110 ->114        | -0.16596  |           |           |          |              |
| 110 ->115        | -0.30496  |           |           |          |              |

|                   |           |           |           |          |              |
|-------------------|-----------|-----------|-----------|----------|--------------|
| Excited State 10: | Singlet-A | 5.5429 eV | 223.68 nm | f=0.0489 | <S**2>=0.000 |
| 107 ->111         | 0.14017   |           |           |          |              |
| 107 ->115         | -0.10780  |           |           |          |              |
| 109 ->112         | -0.13756  |           |           |          |              |
| 109 ->113         | 0.64728   |           |           |          |              |
| Excited State 11: | Singlet-A | 5.6433 eV | 219.70 nm | f=0.0470 | <S**2>=0.000 |
| 106 ->111         | 0.24872   |           |           |          |              |
| 107 ->112         | -0.10236  |           |           |          |              |
| 110 ->114         | 0.11194   |           |           |          |              |
| 110 ->115         | 0.52554   |           |           |          |              |
| 110 ->116         | 0.33357   |           |           |          |              |
| Excited State 12: | Singlet-A | 5.7878 eV | 214.22 nm | f=0.0515 | <S**2>=0.000 |
| 109 ->114         | 0.59904   |           |           |          |              |
| 110 ->115         | -0.12535  |           |           |          |              |
| 110 ->116         | 0.30914   |           |           |          |              |
| Excited State 13: | Singlet-A | 5.8355 eV | 212.47 nm | f=0.0094 | <S**2>=0.000 |
| 106 ->111         | -0.16958  |           |           |          |              |
| 108 ->112         | -0.17749  |           |           |          |              |
| 109 ->114         | -0.29121  |           |           |          |              |
| 110 ->115         | -0.23248  |           |           |          |              |
| 110 ->116         | 0.48561   |           |           |          |              |
| Excited State 14: | Singlet-A | 5.8693 eV | 211.24 nm | f=0.0000 | <S**2>=0.000 |
| 105 ->111         | 0.70156   |           |           |          |              |
| Excited State 15: | Singlet-A | 6.0909 eV | 203.56 nm | f=0.0591 | <S**2>=0.000 |
| 93 ->111          | 0.27096   |           |           |          |              |
| 96 ->111          | 0.12504   |           |           |          |              |
| 102 ->111         | -0.11006  |           |           |          |              |
| 103 ->111         | 0.49917   |           |           |          |              |
| 108 ->112         | -0.29285  |           |           |          |              |
| Excited State 16: | Singlet-A | 6.1337 eV | 202.13 nm | f=0.0811 | <S**2>=0.000 |
| 93 ->111          | 0.14084   |           |           |          |              |
| 103 ->111         | 0.23223   |           |           |          |              |
| 107 ->112         | 0.10844   |           |           |          |              |
| 107 ->113         | -0.11676  |           |           |          |              |
| 108 ->112         | 0.54959   |           |           |          |              |
| 108 ->113         | -0.21780  |           |           |          |              |
| Excited State 17: | Singlet-A | 6.2174 eV | 199.41 nm | f=0.0056 | <S**2>=0.000 |
| 93 ->111          | 0.31809   |           |           |          |              |
| 94 ->111          | 0.18870   |           |           |          |              |
| 95 ->111          | -0.13870  |           |           |          |              |
| 96 ->111          | 0.34080   |           |           |          |              |
| 97 ->111          | 0.17793   |           |           |          |              |
| 98 ->111          | -0.22859  |           |           |          |              |

|                   |           |           |           |          |              |  |
|-------------------|-----------|-----------|-----------|----------|--------------|--|
| 103 ->111         | -0.33738  |           |           |          |              |  |
| Excited State 18: | Singlet-A | 6.3037 eV | 196.69 nm | f=0.0336 | <S**2>=0.000 |  |
| 107 ->112         | 0.51543   |           |           |          |              |  |
| 107 ->113         | 0.10627   |           |           |          |              |  |
| 108 ->113         | -0.23894  |           |           |          |              |  |
| 109 ->115         | -0.37788  |           |           |          |              |  |
| Excited State 19: | Singlet-A | 6.4014 eV | 193.68 nm | f=0.0492 | <S**2>=0.000 |  |
| 97 ->111          | 0.14282   |           |           |          |              |  |
| 107 ->112         | 0.20061   |           |           |          |              |  |
| 107 ->113         | 0.31943   |           |           |          |              |  |
| 108 ->113         | -0.20899  |           |           |          |              |  |
| 109 ->115         | 0.46828   |           |           |          |              |  |
| 109 ->116         | 0.12126   |           |           |          |              |  |
| Excited State 20: | Singlet-A | 6.4517 eV | 192.17 nm | f=0.0112 | <S**2>=0.000 |  |
| 93 ->111          | 0.44498   |           |           |          |              |  |
| 95 ->111          | 0.27020   |           |           |          |              |  |
| 96 ->111          | -0.11237  |           |           |          |              |  |
| 98 ->111          | 0.38149   |           |           |          |              |  |
| 103 ->111         | -0.13048  |           |           |          |              |  |
| Excited State 21: | Singlet-A | 6.4978 eV | 190.81 nm | f=0.0233 | <S**2>=0.000 |  |
| 106 ->112         | 0.60141   |           |           |          |              |  |
| 108 ->114         | -0.30792  |           |           |          |              |  |
| 109 ->116         | -0.10064  |           |           |          |              |  |
| Excited State 22: | Singlet-A | 6.5861 eV | 188.25 nm | f=0.0491 | <S**2>=0.000 |  |
| 95 ->111          | 0.11697   |           |           |          |              |  |
| 97 ->111          | 0.24704   |           |           |          |              |  |
| 102 ->111         | -0.19875  |           |           |          |              |  |
| 106 ->112         | 0.19608   |           |           |          |              |  |
| 107 ->113         | -0.17510  |           |           |          |              |  |
| 108 ->114         | 0.40108   |           |           |          |              |  |
| 109 ->116         | -0.21224  |           |           |          |              |  |
| Excited State 23: | Singlet-A | 6.5899 eV | 188.14 nm | f=0.0487 | <S**2>=0.000 |  |
| 95 ->111          | -0.10875  |           |           |          |              |  |
| 97 ->111          | -0.24079  |           |           |          |              |  |
| 102 ->111         | 0.23042   |           |           |          |              |  |
| 106 ->112         | 0.26657   |           |           |          |              |  |
| 106 ->113         | -0.10852  |           |           |          |              |  |
| 108 ->114         | 0.33441   |           |           |          |              |  |
| 109 ->116         | 0.31885   |           |           |          |              |  |
| Excited State 24: | Singlet-A | 6.6099 eV | 187.57 nm | f=0.0142 | <S**2>=0.000 |  |
| 97 ->111          | 0.11883   |           |           |          |              |  |
| 100 ->111         | 0.25609   |           |           |          |              |  |
| 102 ->111         | 0.55671   |           |           |          |              |  |
| 103 ->111         | 0.10763   |           |           |          |              |  |

|               |          |           |           |           |          |              |  |
|---------------|----------|-----------|-----------|-----------|----------|--------------|--|
| 109 ->116     | -0.26111 |           |           |           |          |              |  |
| Excited State | 25:      | Singlet-A | 6.6298 eV | 187.01 nm | f=0.0251 | <S**2>=0.000 |  |
| 97 ->111      | 0.19160  |           |           |           |          |              |  |
| 100 ->111     | 0.26968  |           |           |           |          |              |  |
| 104 ->111     | 0.53802  |           |           |           |          |              |  |
| 108 ->113     | 0.12581  |           |           |           |          |              |  |
| 109 ->116     | 0.23345  |           |           |           |          |              |  |
| Excited State | 26:      | Singlet-A | 6.6434 eV | 186.63 nm | f=0.0710 | <S**2>=0.000 |  |
| 95 ->111      | -0.10077 |           |           |           |          |              |  |
| 97 ->111      | -0.31985 |           |           |           |          |              |  |
| 104 ->111     | 0.38531  |           |           |           |          |              |  |
| 107 ->112     | -0.11689 |           |           |           |          |              |  |
| 107 ->113     | 0.15325  |           |           |           |          |              |  |
| 108 ->113     | -0.18628 |           |           |           |          |              |  |
| 109 ->116     | -0.28566 |           |           |           |          |              |  |
| Excited State | 27:      | Singlet-A | 6.6532 eV | 186.35 nm | f=0.0009 | <S**2>=0.000 |  |
| 99 ->111      | -0.20562 |           |           |           |          |              |  |
| 101 ->111     | 0.66555  |           |           |           |          |              |  |
| Excited State | 28:      | Singlet-A | 6.7120 eV | 184.72 nm | f=0.0082 | <S**2>=0.000 |  |
| 96 ->111      | -0.17672 |           |           |           |          |              |  |
| 100 ->111     | 0.55529  |           |           |           |          |              |  |
| 102 ->111     | -0.24653 |           |           |           |          |              |  |
| 104 ->111     | -0.23205 |           |           |           |          |              |  |
| Excited State | 29:      | Singlet-A | 6.7679 eV | 183.20 nm | f=0.1536 | <S**2>=0.000 |  |
| 89 ->111      | 0.13121  |           |           |           |          |              |  |
| 95 ->111      | -0.11517 |           |           |           |          |              |  |
| 99 ->111      | 0.31140  |           |           |           |          |              |  |
| 106 ->113     | -0.11374 |           |           |           |          |              |  |
| 107 ->113     | -0.12504 |           |           |           |          |              |  |
| 107 ->114     | 0.46430  |           |           |           |          |              |  |
| 108 ->113     | -0.21846 |           |           |           |          |              |  |
| 108 ->114     | -0.13044 |           |           |           |          |              |  |
| Excited State | 30:      | Singlet-A | 6.7756 eV | 182.99 nm | f=0.0402 | <S**2>=0.000 |  |
| 95 ->111      | -0.11095 |           |           |           |          |              |  |
| 99 ->111      | 0.55704  |           |           |           |          |              |  |
| 101 ->111     | 0.17210  |           |           |           |          |              |  |
| 107 ->114     | -0.29872 |           |           |           |          |              |  |
| 108 ->113     | 0.10100  |           |           |           |          |              |  |
| Excited State | 31:      | Singlet-A | 6.7925 eV | 182.53 nm | f=0.2898 | <S**2>=0.000 |  |
| 106 ->113     | -0.13177 |           |           |           |          |              |  |
| 107 ->113     | 0.32928  |           |           |           |          |              |  |
| 107 ->114     | 0.34553  |           |           |           |          |              |  |
| 108 ->112     | 0.15817  |           |           |           |          |              |  |

|                   |           |           |           |          |              |  |
|-------------------|-----------|-----------|-----------|----------|--------------|--|
| 108 ->113         | 0.32817   |           |           |          |              |  |
| 109 ->114         | -0.10573  |           |           |          |              |  |
| Excited State 32: | Singlet-A | 6.8030 eV | 182.25 nm | f=0.0250 | <S**2>=0.000 |  |
| 89 ->111          | 0.20516   |           |           |          |              |  |
| 90 ->111          | -0.11095  |           |           |          |              |  |
| 94 ->111          | 0.15851   |           |           |          |              |  |
| 95 ->111          | -0.23256  |           |           |          |              |  |
| 96 ->111          | 0.22187   |           |           |          |              |  |
| 98 ->111          | 0.46593   |           |           |          |              |  |
| 100 ->111         | 0.10010   |           |           |          |              |  |
| 107 ->113         | 0.15739   |           |           |          |              |  |
| Excited State 33: | Singlet-A | 6.8324 eV | 181.47 nm | f=0.0082 | <S**2>=0.000 |  |
| 91 ->111          | 0.42498   |           |           |          |              |  |
| 92 ->111          | 0.48113   |           |           |          |              |  |
| 97 ->111          | -0.11296  |           |           |          |              |  |
| 108 ->113         | -0.11698  |           |           |          |              |  |
| Excited State 34: | Singlet-A | 6.8698 eV | 180.48 nm | f=0.0223 | <S**2>=0.000 |  |
| 106 ->113         | 0.63706   |           |           |          |              |  |
| 107 ->114         | 0.19270   |           |           |          |              |  |
| Excited State 35: | Singlet-A | 6.9147 eV | 179.31 nm | f=0.0018 | <S**2>=0.000 |  |
| 88 ->111          | 0.13767   |           |           |          |              |  |
| 89 ->111          | 0.33108   |           |           |          |              |  |
| 91 ->111          | -0.22257  |           |           |          |              |  |
| 94 ->111          | -0.20231  |           |           |          |              |  |
| 95 ->111          | 0.27322   |           |           |          |              |  |
| 96 ->111          | 0.19113   |           |           |          |              |  |
| 97 ->111          | -0.27584  |           |           |          |              |  |
| 98 ->111          | -0.15015  |           |           |          |              |  |
| 100 ->111         | 0.13321   |           |           |          |              |  |
| Excited State 36: | Singlet-A | 6.9357 eV | 178.76 nm | f=0.0292 | <S**2>=0.000 |  |
| 107 ->113         | 0.12377   |           |           |          |              |  |
| 109 ->118         | -0.13652  |           |           |          |              |  |
| 110 ->117         | 0.29116   |           |           |          |              |  |
| 110 ->118         | 0.56043   |           |           |          |              |  |
| Excited State 37: | Singlet-A | 6.9627 eV | 178.07 nm | f=0.2370 | <S**2>=0.000 |  |
| 89 ->111          | -0.23594  |           |           |          |              |  |
| 96 ->111          | 0.29690   |           |           |          |              |  |
| 97 ->111          | -0.22296  |           |           |          |              |  |
| 100 ->111         | 0.10065   |           |           |          |              |  |
| 106 ->114         | -0.19150  |           |           |          |              |  |
| 107 ->112         | 0.21542   |           |           |          |              |  |
| 107 ->113         | -0.26320  |           |           |          |              |  |
| 108 ->113         | 0.12779   |           |           |          |              |  |
| 109 ->115         | 0.19469   |           |           |          |              |  |

Excited State 38: Singlet-A 7.0199 eV 176.62 nm f=0.1654 <S\*\*2>=0.000  
87 ->111 -0.17201  
88 ->111 0.10674  
89 ->111 0.32228  
91 ->111 0.10314  
93 ->111 0.15231  
94 ->111 -0.10641  
95 ->111 -0.25900  
96 ->111 -0.22367  
106 ->114 -0.18966  
107 ->112 0.16033  
107 ->113 -0.14940  
108 ->113 0.11502  
109 ->115 0.14616

Excited State 39: Singlet-A 7.0620 eV 175.56 nm f=0.0160 <S\*\*2>=0.000  
89 ->111 0.17041  
90 ->111 -0.10976  
94 ->111 0.54629  
95 ->111 0.30472  
96 ->111 -0.13863  
99 ->111 0.11253

Excited State 40: Singlet-A 7.0693 eV 175.38 nm f=0.0813 <S\*\*2>=0.000  
106 ->114 0.58590  
107 ->112 0.11581  
108 ->113 0.11237  
108 ->115 0.16551  
109 ->116 -0.17887

Excited State 41: Singlet-A 7.1285 eV 173.93 nm f=0.0374 <S\*\*2>=0.000  
108 ->115 0.65261

Excited State 42: Singlet-A 7.2166 eV 171.80 nm f=0.0095 <S\*\*2>=0.000  
107 ->115 0.10088  
110 ->117 -0.24641  
110 ->119 0.30772  
110 ->120 0.50702  
110 ->121 -0.11218  
110 ->122 0.10067

Excited State 43: Singlet-A 7.2309 eV 171.46 nm f=0.0001 <S\*\*2>=0.000  
105 ->112 0.69118

Excited State 44: Singlet-A 7.2986 eV 169.87 nm f=0.0216 <S\*\*2>=0.000  
87 ->111 -0.20066  
88 ->111 0.31295  
90 ->111 0.28424  
91 ->111 0.30785  
92 ->111 -0.29614  
93 ->111 -0.14081

|                   |           |           |           |          |              |  |
|-------------------|-----------|-----------|-----------|----------|--------------|--|
| 96 ->111          | 0.18429   |           |           |          |              |  |
| Excited State 45: | Singlet-A | 7.3177 eV | 169.43 nm | f=0.1218 | <S**2>=0.000 |  |
| 88 ->111          | -0.13596  |           |           |          |              |  |
| 90 ->111          | -0.13706  |           |           |          |              |  |
| 97 ->112          | -0.14899  |           |           |          |              |  |
| 107 ->115         | 0.56801   |           |           |          |              |  |
| Excited State 46: | Singlet-A | 7.3370 eV | 168.99 nm | f=0.0181 | <S**2>=0.000 |  |
| 87 ->111          | 0.11877   |           |           |          |              |  |
| 88 ->111          | 0.25134   |           |           |          |              |  |
| 89 ->111          | -0.13868  |           |           |          |              |  |
| 90 ->111          | 0.34279   |           |           |          |              |  |
| 91 ->111          | -0.28421  |           |           |          |              |  |
| 92 ->111          | 0.26049   |           |           |          |              |  |
| 94 ->111          | 0.13994   |           |           |          |              |  |
| 95 ->111          | -0.13512  |           |           |          |              |  |
| 107 ->115         | 0.21769   |           |           |          |              |  |
| Excited State 47: | Singlet-A | 7.3783 eV | 168.04 nm | f=0.0118 | <S**2>=0.000 |  |
| 108 ->116         | -0.18232  |           |           |          |              |  |
| 110 ->117         | 0.25604   |           |           |          |              |  |
| 110 ->118         | -0.11125  |           |           |          |              |  |
| 110 ->119         | -0.13232  |           |           |          |              |  |
| 110 ->121         | -0.24133  |           |           |          |              |  |
| 110 ->122         | 0.51624   |           |           |          |              |  |
| Excited State 48: | Singlet-A | 7.3875 eV | 167.83 nm | f=0.0151 | <S**2>=0.000 |  |
| 103 ->112         | -0.19980  |           |           |          |              |  |
| 107 ->116         | 0.10541   |           |           |          |              |  |
| 108 ->116         | 0.59367   |           |           |          |              |  |
| 110 ->122         | 0.12873   |           |           |          |              |  |
| Excited State 49: | Singlet-A | 7.4719 eV | 165.93 nm | f=0.0014 | <S**2>=0.000 |  |
| 110 ->117         | 0.43928   |           |           |          |              |  |
| 110 ->118         | -0.28372  |           |           |          |              |  |
| 110 ->120         | 0.26382   |           |           |          |              |  |
| 110 ->122         | -0.30540  |           |           |          |              |  |
| 110 ->123         | 0.15003   |           |           |          |              |  |
| Excited State 50: | Singlet-A | 7.4875 eV | 165.59 nm | f=0.0029 | <S**2>=0.000 |  |
| 90 ->112          | 0.10089   |           |           |          |              |  |
| 94 ->112          | -0.15932  |           |           |          |              |  |
| 95 ->112          | 0.25944   |           |           |          |              |  |
| 95 ->113          | -0.13343  |           |           |          |              |  |
| 96 ->112          | -0.18573  |           |           |          |              |  |
| 98 ->112          | 0.24792   |           |           |          |              |  |
| 98 ->113          | -0.12477  |           |           |          |              |  |
| 103 ->112         | 0.35768   |           |           |          |              |  |
| 103 ->113         | -0.12213  |           |           |          |              |  |
| 107 ->115         | -0.10086  |           |           |          |              |  |

108 ->116 0.14697

## 5. References for supporting information

(1) Becke, A. D. *J. Chem. Phys.* **1993**, *98*, 5648.

(2) Gaussian 09, Revision A.02, Frisch, M. J.; Trucks, G. W.; Schlegel, H. B.; Scuseria, G. E.; Robb, M. A.; Cheeseman, J. R.; Scalmani, G.; Barone, V.; Mennucci, B.; Petersson, G. A.; Nakatsuji, H.; Caricato, M.; Li, X.; Hratchian, H. P.; Izmaylov, A. F.; Bloino, J.; Zheng, G.; Sonnenberg, J. L.; Hada, M.; Ehara, M.; Toyota, K.; Fukuda, R.; Hasegawa, J.; Ishida, M.; Nakajima, T.; Honda, Y.; Kitao, O.; Nakai, H.; Vreven, T.; Montgomery, J. A.; Jr., Peralta, J. E.; Ogliaro, F.; Bearpark, M.; Heyd, J. J.; Brothers, E.; Kudin, K. N.; Staroverov, V. N.; Kobayashi, R.; Normand, J.; Raghavachari, K.; Rendell, A.; Burant, J. C.; Iyengar, S. S.; Tomasi, J.; Cossi, M.; Rega, N.; Millam, J. M.; Klene, M.; Knox, J. E.; Cross, J. B.; Bakken, V.; Adamo, C.; Jaramillo, J.; Gomperts, R.; Stratmann, R. E.; Yazyev, O.; Austin, A. J.; Cammi, R.; Pomelli, C.; Ochterski, J. W.; Martin, R. L.; Morokuma, K.; Zakrzewski, V. G.; Voth, G. A.; Salvador, P.; Dannenberg, J. J.; Dapprich, S.; Daniels, A. D.; Farkas, O.; Foresman, J. B.; Ortiz, J. V.; Cioslowski, J.; Fox, D. J. Gaussian, Inc., Wallingford CT, **2009**.

(3) Becke, A. D. *Phys. Rev. A* **1988**, *38*, 3098.



(4) Lee, C.; Yang, W.; Parr, R. G. *Phys. Rev. B* **1988**, *37*, 785.

(5) Kim, B.; Yeom, H. R.; Choi, W. Y.; Kim, J. Y.; Yang, C. *Tetrahedron* **2012**, *68*, 6696.
